# Supplementary material for: Electrocatalysis of polysulfide conversion by conductive RuO2 nano dots for lithium–sulfur batteries
Source: Royal Society of Chemistry journal article supplement (doi:10.1039/c8nr04182b), 2018-01-01
Supplement: c8nr04182b1.pdf [file c8nr04182b1.pdf]

# Electrocatalysis of polysulfide conversion by conductive RuO<sub>2</sub> Nano Dots for lithium–sulfur batteries

Ruxing Wang,<sup>a</sup> Kangli Wang,<sup>\*,a</sup> Shu Gao,<sup>b</sup> Mao Jiang,<sup>b</sup> Jing Han,<sup>b</sup> Min Zhou,<sup>a</sup> Shijie Cheng,<sup>a</sup>  
Kai Jiang,<sup>\*,a</sup>

<sup>a</sup>State Key Laboratory of Advanced Electromagnetic Engineering and Technology, School of Electrical and Electronic Engineering, Huazhong University of Science and Technology, Wuhan, Hubei 430074, China

<sup>b</sup>State Key Laboratory of Materials Processing and Die & Mould Technology, School of Materials Science and Engineering, Huazhong University of Science and Technology, Wuhan, Hubei 430074, China.

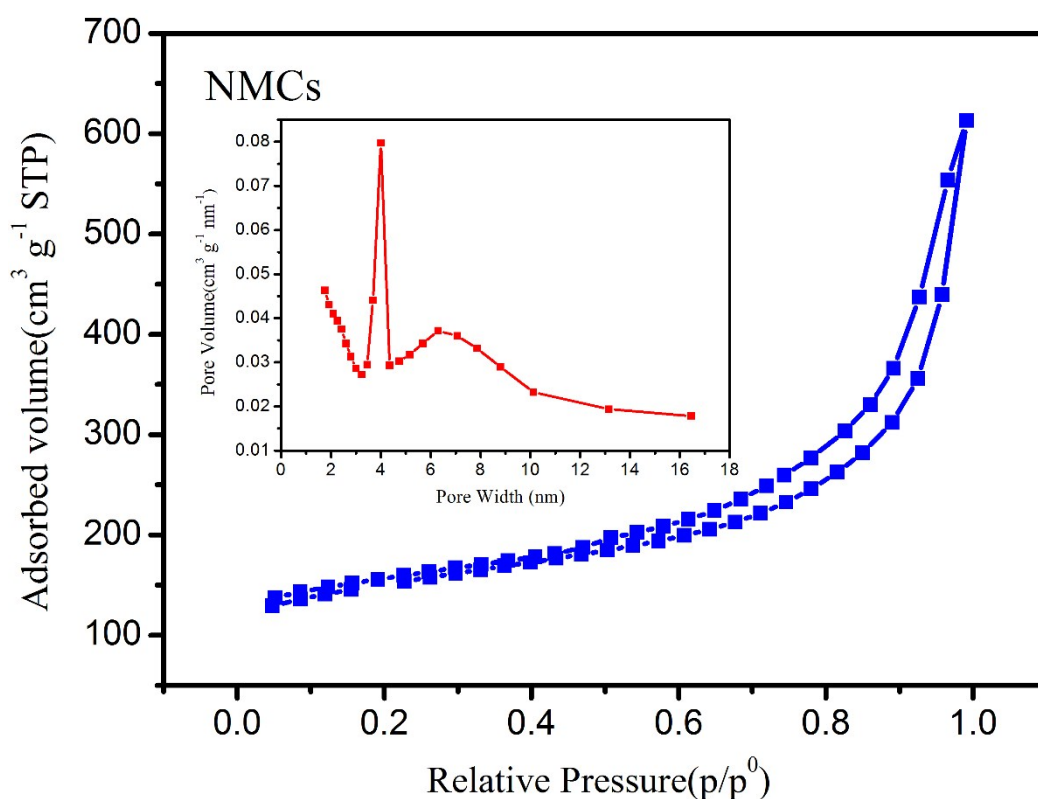

Figure S1. The nitrogen adsorption/desorption curves and pore diameter distributions of the NMCs composite.

**Crystal size calculation:** Based on the Debye Scherrer equation  $D = \kappa\lambda/B_{1/2}\cos\theta$ , the crystal size of RuO<sub>2</sub> are calculated to be  $D_{(110)} = 5.9\text{ nm}$ ,  $D_{(101)} = 9.3\text{ nm}$ ,  $D_{(211)} = 7.4\text{ nm}$ . The particle size calculated by the Sherrer formula from the XRD patterns shows a small difference compared with the TEM images, which may attributed to differences on test equipment, instrumental error and the existence of a certain degree of particle size distribution.

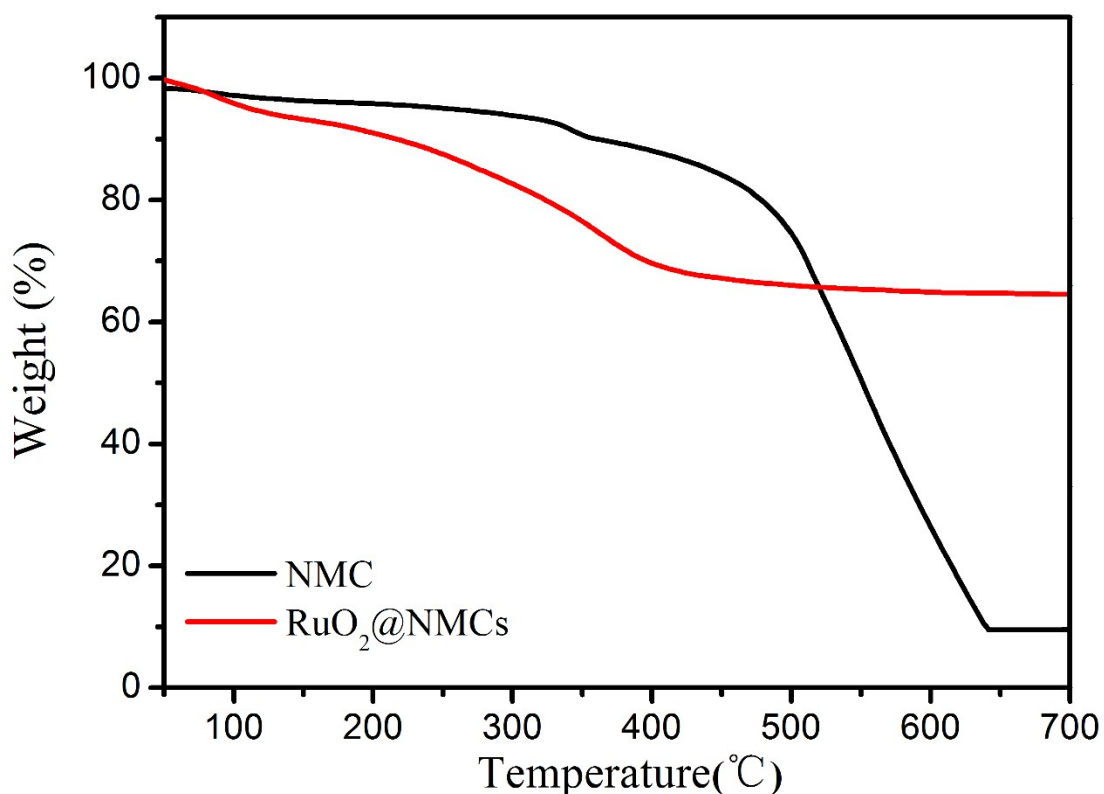

Figure S2. TGA curves of the NMCs and RuO<sub>2</sub>@NMCs composites.

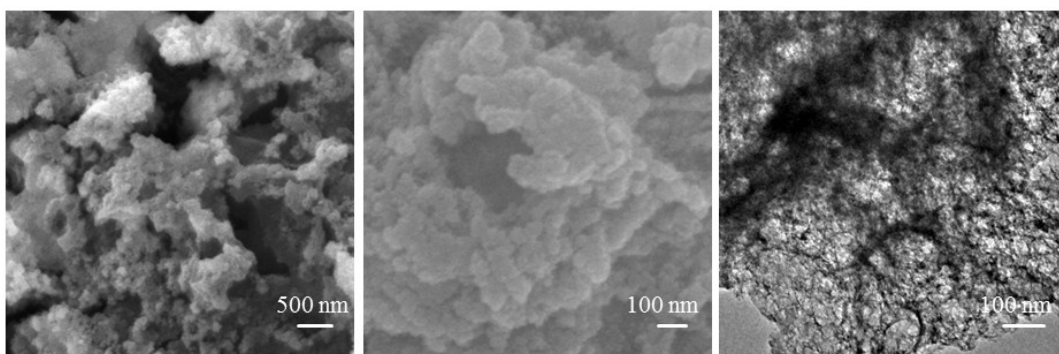

Figure S3. SEM and TEM images of NMCs/S

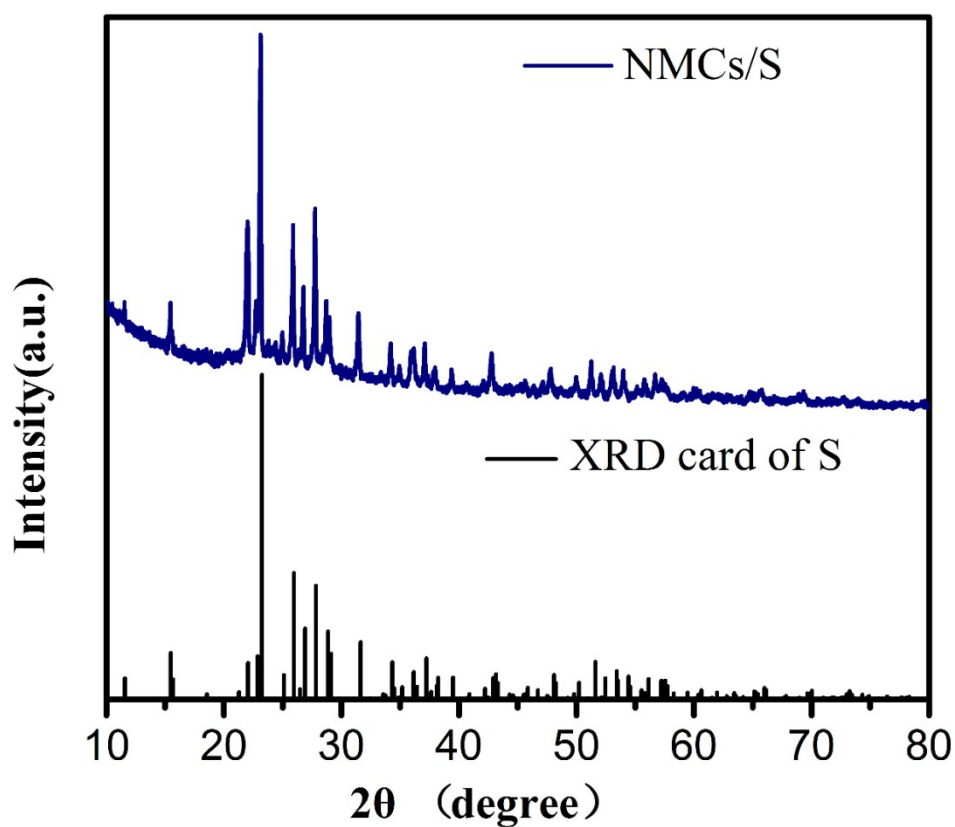

Figure S4. XRD patterns of the as-prepared NMCs/S with the corresponding PDF standard card.

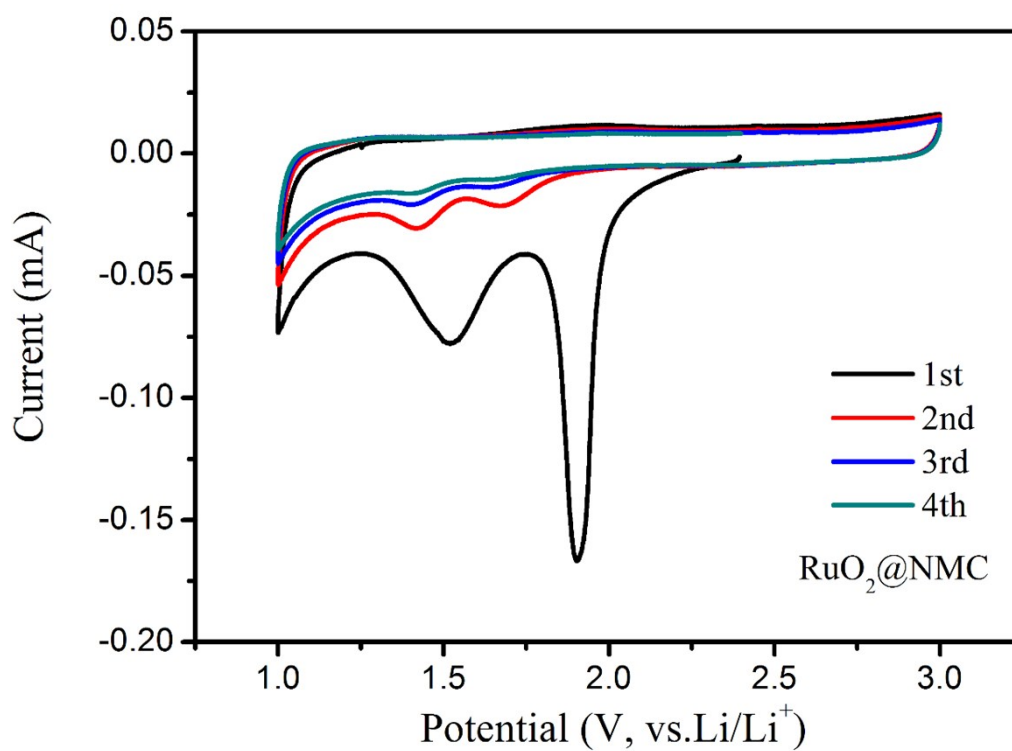

Figure S5. CV curves of the initial four cycles of the RuO<sub>2</sub>@NMC cathode at a scan rate of 0.1

mV s<sup>-1</sup>.

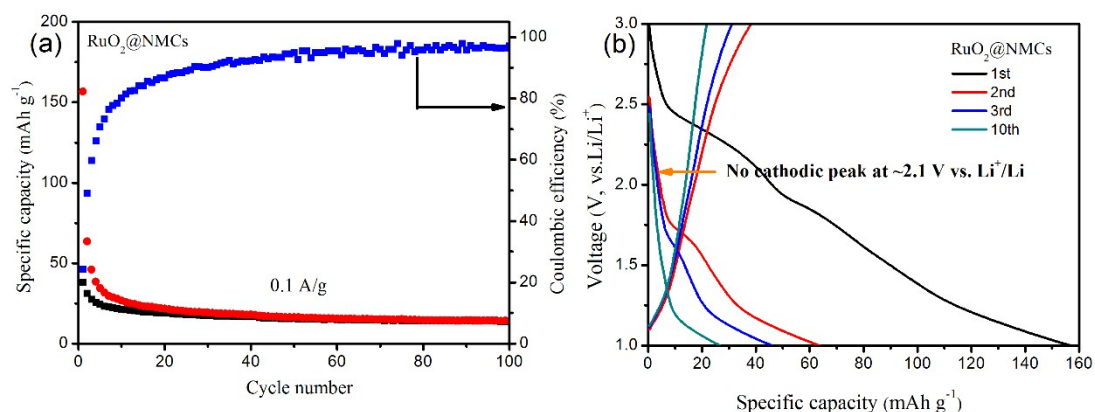

Figure S6. (a) Cycle performances of the RuO<sub>2</sub>@NMCs electrode at 0.1 A/g. (b) Charge and discharge curves of the RuO<sub>2</sub>@NMCs electrode.

**The illustration of the fitting unit of the equivalent circuits for EIS fitting:** The EIS spectra are composed of a depressed semicircle in the high frequency region and a long inclined line in the low frequency before cycling, corresponding to the charge-transfer process ( $R_{ct}$ ) and a semi-infinite Warburg diffusion process, respectively. The intercept at high frequency is associated with the combination resistances ( $R_s$ ) constituted by ionic resistance of electrolyte, the intrinsic resistance of active materials, and some contact resistances between active materials and current collectors. After the first cycle, a new semicircle in the medium frequency appeared, which is related to the formation of an insulating layer of lithium sulfide (Li<sub>2</sub>S) on the host matrix in the cathode and probably the gradual build-up of solid-electrolyte interphase (SEI) resistance ( $R_e$ )

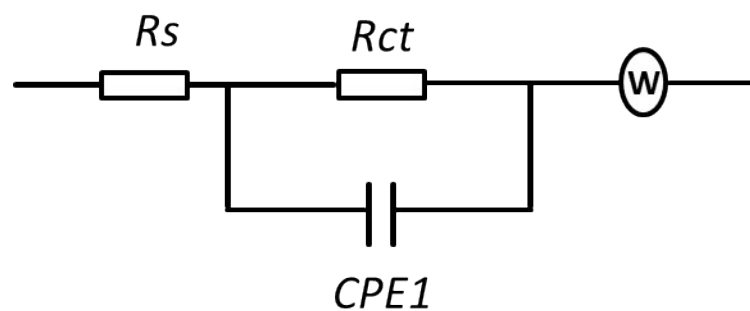

Figure S7. The equivalent circuits for EIS fitting before cycling test

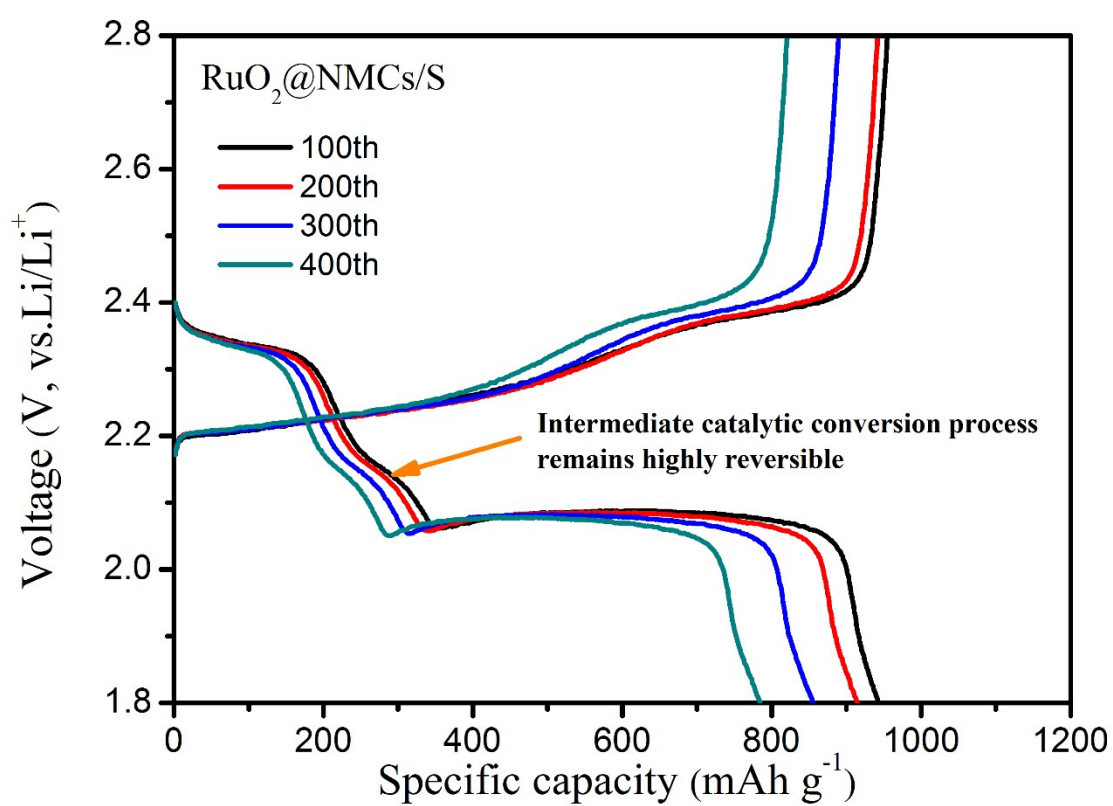

Figure S8. Charge-discharge profiles of the  $\text{RuO}_2@\text{NMCs/S}$  composite at 0.5C in 100, 200, 300 and 400 cycles.

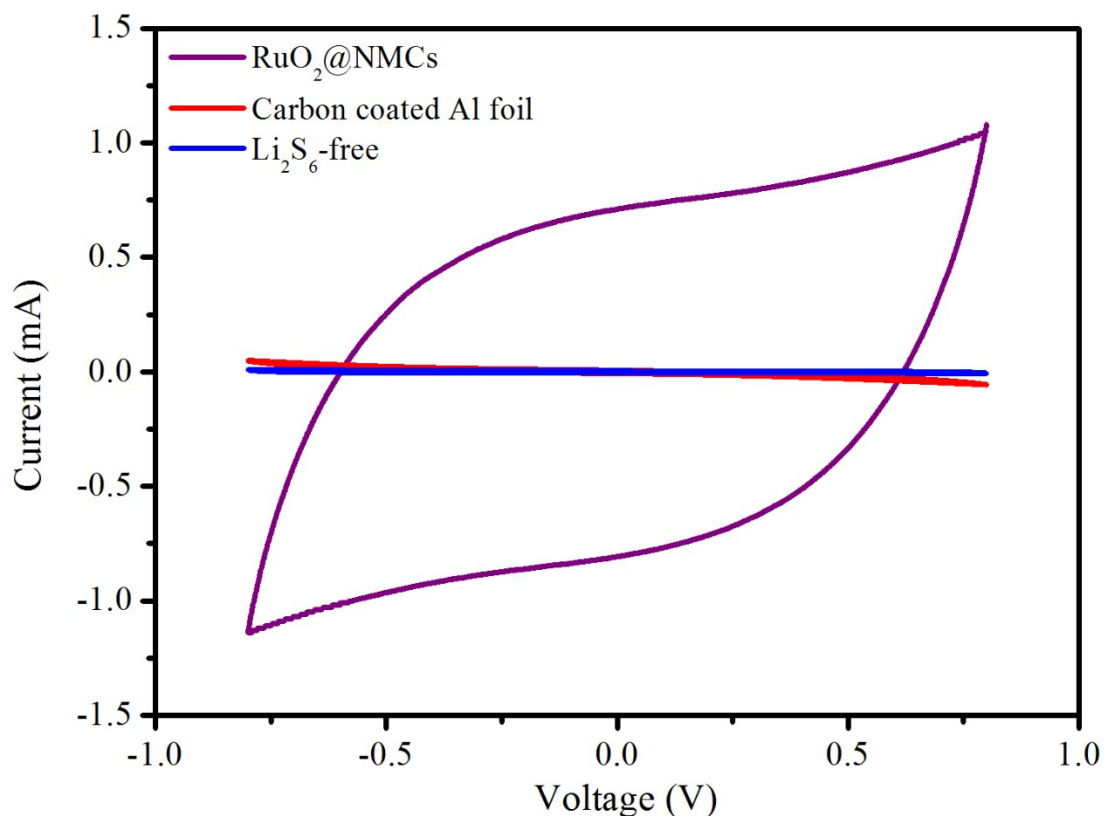

Figure S9. Cyclic voltammograms of symmetric cells of RuO<sub>2</sub>@NMCs, Carbon coated aluminum foil electrodes with and without Li<sub>2</sub>S<sub>6</sub>.

**Synthesis details of Li<sub>2</sub>S<sub>6</sub> and RuO<sub>2</sub>-Li<sub>2</sub>S<sub>6</sub>:** The Li<sub>2</sub>S<sub>6</sub> solution were prepared by dissolving and mixing stoichiometric amounts of Li<sub>2</sub>S and sulfur in a molar ratio of 5 :1 in 1,3-dioxolane and 1,2-dimethoxyethane (v/v = 1:1) at 60°C with stirring for 24 h. The chemical interaction between RuO<sub>2</sub> and lithium polysulfides was investigated by XPS. Typically, 20 mg of RuO<sub>2</sub>@NMCs was placed in 10 mL of Li<sub>2</sub>S<sub>6</sub> (2 mM) to obtain the RuO<sub>2</sub>-Li<sub>2</sub>S<sub>6</sub> solution. After settling for 12h, the precipitated RuO<sub>2</sub>-Li<sub>2</sub>S<sub>6</sub> product was dried for XPS analysis.

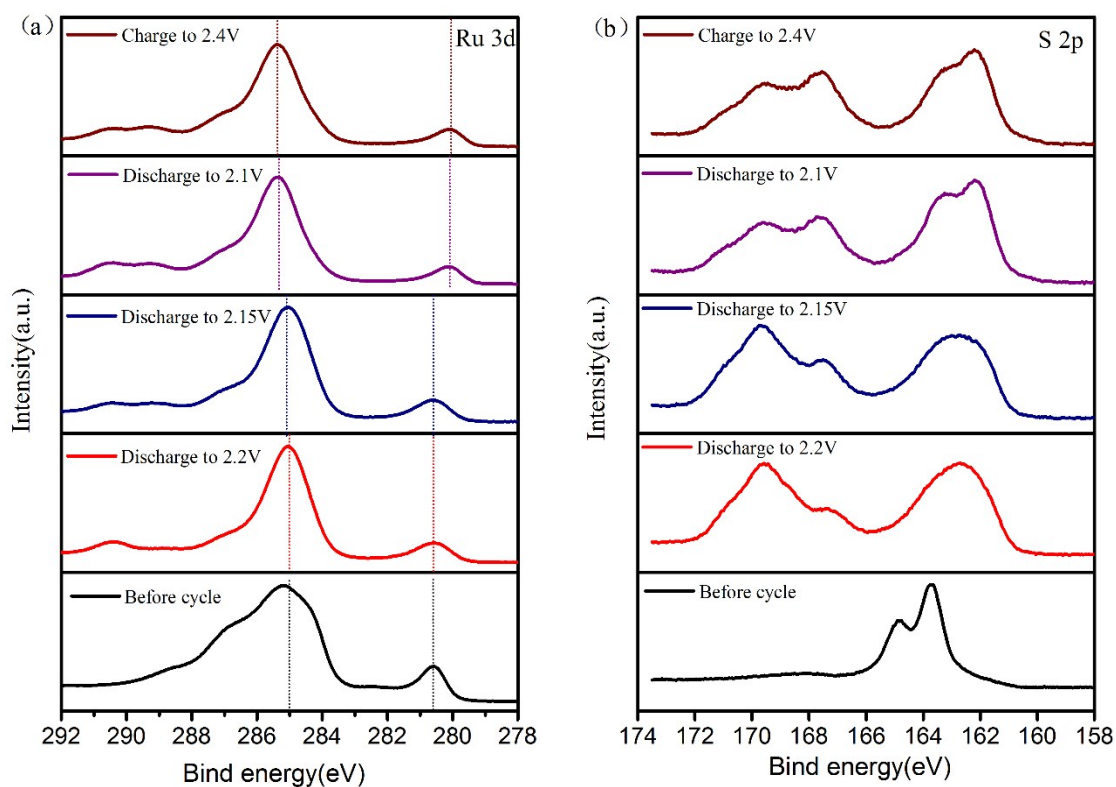

Figure S10. The *Ex-situ* XPS study on RuO<sub>2</sub>@NMCs/S electrodes extracted from cells at different discharge states.

**Table. S1.** Comparisons of the cycling performance of this work with that of other composite cathodes from recent publications.

| Composite materials                             | Initial discharge capacity (mAh g <sup>-1</sup> ) | Cycle life | Current rate | Decay rate per cycle (%) |
|-------------------------------------------------|---------------------------------------------------|------------|--------------|--------------------------|
| S/TiN <sup>[1]</sup>                            | 988                                               | 500        | 0.5          | 0.07                     |
| S/Nb <sub>2</sub> O <sub>5</sub> <sup>[2]</sup> | 1289                                              | 200        | 0.5          | 0.14                     |
| N-HPC-CNT/S <sup>[3]</sup>                      | 622                                               | 600        | 1.0          | 0.07                     |
| MP-C/rGO/S <sup>[4]</sup>                       | 919                                               | 500        | 1.0          | 0.073                    |
| MoS <sub>2</sub> /rGO/S <sup>[5]</sup>          | 1159                                              | 600        | 0.5          | 0.083                    |
| S/CoO/HCN <sup>[6]</sup>                        | 882                                               | 200        | 0.5          | 0.11                     |
| <b>This work</b>                                | 1065                                              | 500        | 0.5          | 0.07                     |

### Supporting Reference

- [1] Z. Cui, C. Zu, W. Zhou, A. Manthiram, J. B. Goodenough. Mesoporous titanium nitride-enabled highly stable lithium-sulfur batteries. *Adv. Mater.* 28 (2016) 6926-6931.
- [2] Y. Tao, Y. Wei, Y. Liu, J. Wang, W. Qiao, L. Ling, D. Long. Kinetically-enhanced polysulfide redox reactions by Nb<sub>2</sub>O<sub>5</sub> nanocrystals for high-rate lithium-sulfur battery. *Energy Environ. Sci.* 9 (2016) 3230-3239.

- [3] Cai, J.; Wu, C.; Yang, S.; Zhu, Y.; Shen, P. K.; Zhang, K., Templated and Catalytic Fabrication of N-Doped Hierarchical Porous Carbon-Carbon Nanotube Hybrids as Host for Lithium-Sulfur Batteries. *ACS applied materials & interfaces* **2017**, *9* (39), 33876-33886.
- [4] Qian, W.; Gao, Q.; Li, Z.; Tian, W.; Zhang, H.; Zhang, Q., Unusual Mesoporous Carbonaceous Matrix Loading with Sulfur as the Cathode of Lithium Sulfur Battery with Exceptionally Stable High Rate Performance. *ACS applied materials & interfaces* **2017**, *9* (34), 28366-28376.
- [5] Lin, H.; Yang, L.; Jiang, X.; Li, G.; Zhang, T.; Yao, Q.; Zheng, G. W.; Lee, J. Y., Electrocatalysis of polysulfide conversion by sulfur-deficient MoS<sub>2</sub> nanoflakes for lithium-sulfur batteries. *Energy & Environmental Science* **2017**, *10* (6), 1476-1486.
- [6] Wu, S.; Wang, Y.; Na, S.; Chen, C.; Yu, T.; Wang, H.; Zang, H., Porous hollow carbon nanospheres embedded with well-dispersed cobalt monoxide nanocrystals as effective polysulfide reservoirs for high-rate and long-cycle lithium-sulfur batteries. *Journal of Materials Chemistry A* **2017**, *5* (33), 17352-17359.
